# Supplementary material
Source: Springer Nature journal article supplement (https://www.springermedizin.de/resource/supplementary/12936_2011_2080_MOESM1_ESM.pdf/9543410)

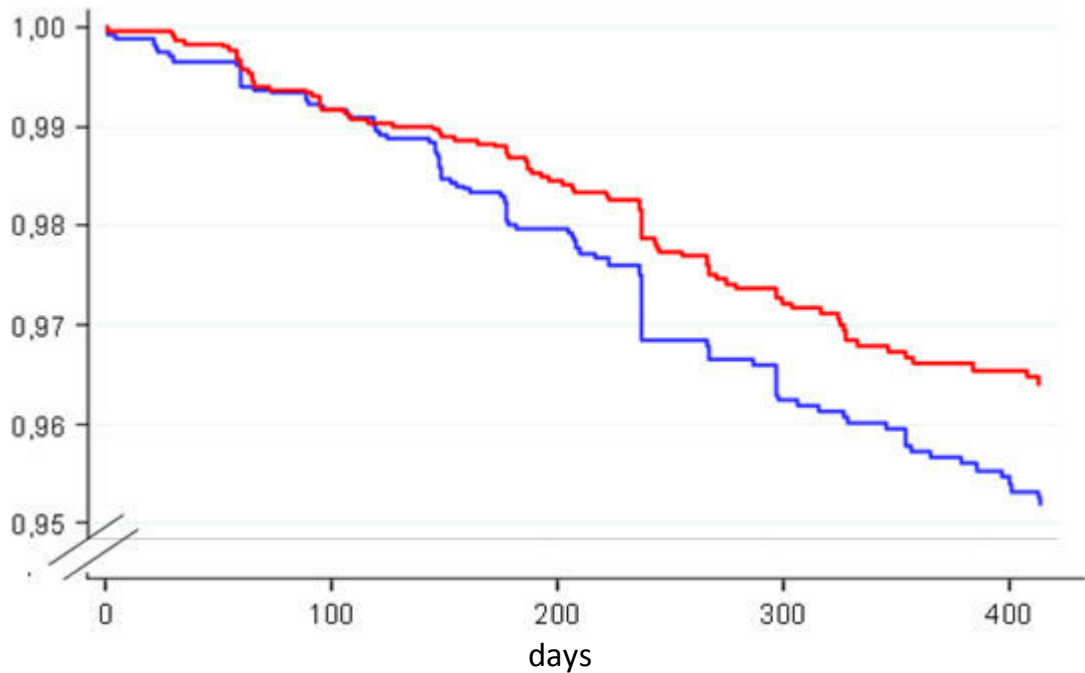

**Control zone**

**IPTi - SP**

Supplement: MOESM1 [file 9543410]
